# Supplementary material for: Electrochemical behaviors and relativistic DFT calculations to understand the terminal ligand influence on the [Re6(μ3-Q)8X6]4− clusters
Source: Royal Society of Chemistry journal article supplement (doi:10.1039/c7nj05114j), 2018-01-01
Supplement: c7nj05114j1.pdf [file c7nj05114j1.pdf]

## Supporting Information

---

### Electrochemical behaviors and relativistic DFT calculations to understand the terminal ligand influence on the $[\text{Re}_6(\mu_3\text{-Q})_8\text{X}_6]^{4-}$ Clusters

Macarena Rojas-Poblete<sup>a,e</sup>, Alexander Carreño<sup>a,b</sup>, Manuel Gacitúa<sup>c</sup>, Dayán Páez-Hernández<sup>a,b,\*</sup>,  
Walter A. Rabanal-León<sup>d</sup>, and Ramiro Arratia-Pérez<sup>a,b\*</sup>

a. Center of Applied Nanosciences (CANS), Universidad Andrés Bello, República 275, Santiago, Chile.

b. Núcleo Milenio de Ingeniería Molecular para Catálisis y Biosensores (MECB), ICM, Chile.

c. Facultad de Química y Biología, USACH, Av. L.B. O'Higgins 3363, Santiago, 7254758, Chile.

d. Departamento de Ciencias Químicas, Facultad Ciencias Exactas, Universidad Andrés Bello, Av. República 498, Santiago, Chile.

e. Universidad Tecnológica de Chile INACAP, Chile

\*Corresponding author.

| Contents | Page |
|----------|------|
|----------|------|

---

|                                                                |    |
|----------------------------------------------------------------|----|
| 1. Description of the methods used to calculate free energies. | S1 |
|----------------------------------------------------------------|----|

|                                                                                                                                                                               |    |
|-------------------------------------------------------------------------------------------------------------------------------------------------------------------------------|----|
| 2. Table 1: Calculated Values of Changes in Gibbs Free Energies (kcal/mol) and Ground-State Redox Potentials (Volts) of the Rhenium-Sulfur Complexes Using SC-ZORA/BP86/TZ2P. | S2 |
|-------------------------------------------------------------------------------------------------------------------------------------------------------------------------------|----|

|                                                                                                                                                                              |    |
|------------------------------------------------------------------------------------------------------------------------------------------------------------------------------|----|
| Table 2: Calculated Values of Changes in Gibbs Free Energies (kcal/mol) and Ground-State Redox Potentials (Volts) of the Rhenium-Selenium Complexes Using SC-ZORA/BP86/TZ2P. | S3 |
|------------------------------------------------------------------------------------------------------------------------------------------------------------------------------|----|

## 1. Description of the methods used to calculate free energies.

Using the following equation

$$\Delta G_s^0(\text{redox, soln}) = \Delta G_s^0(\text{redox, gas}) + \Delta G_s^0(\text{ox}) - \Delta G_s^0(\text{red}) \quad (1)$$

Where  $^0$  denotes a standard state of 1 mol/L, G is the Gibbs free energy for oxidized cluster ( $\Delta G_s^0(\text{ox})$ ) and reduced cluster ( $\Delta G_s^0(\text{red})$ ).

$$\Delta G_s^0 = H_s^0 - TS_s^0 \quad (\text{ox}) \quad (2)$$

$$\Delta G_s^0 = H_s^0 - TS_s^0 \quad (\text{red}) \quad (3)$$

Where H is the enthalpy (kcal atmL/ mol), T the temperature (Kelvin) and S the entropy (kcal / molK) we have

$$H_s^0 = U_s^0 + (PV)_s^0 \quad (\text{ox}) \quad (4)$$

$$H_s^0 = U_s^0 + (PV)_s^0 \quad (\text{red}) \quad (5)$$

With U equal to the internal energy (kcal /mol), P pressure (atm) and volume V (liters) then you can get

$$G_s^0 = U_s^0 + (pV)_s^0 - TS_s^0 \quad (\text{ox}) \quad (6)$$

$$G_s^0 = U_s^0 + (pV)_s^0 - TS_s^0 \quad (\text{red}) \quad (7)$$

Uniting both equations

$$\Delta G_s^0(\text{redox, gas}) = U_s^0(\text{red}) - U_s^0(\text{ox}) - T(S_s^0(\text{red}) - S_s^0(\text{ox})) \quad (8)$$

$$\Delta G_s^0(\text{redox, gas}) = \Delta U - T\Delta S \quad (9)$$

Once  $\Delta G_s^0(\text{redox, soln})$  calculated, can be estimated potential relative oxidation,  $E^0$ , defined by:

$$E^0 = - \Delta G_s^0(\text{redox, soln})/nF \quad (10)$$

Where n is the number of electrons consumed or generated in the half-reaction of interest, and F is the Faraday constant. The potential is expressed in volt units (for free energy expressed in some typical units,  $F = 23.061$  kcal per volt gram-equivalent).

**2. Table 1: Calculated Values of Changes in Gibbs Free Energies (kcal/mol) and Ground-State Redox Potentials (Volts) of the Rhenium-Sulfur Complexes Using SC-ZORA/BP86/TZ2P.**

| Complexes                                    | Gas-phase G (kcal/mol) | Solv-phase G (kcal/mol) | $\Delta G$ (gas) | $\Delta G^n$ (solv) | $\Delta G^0$ (solv) | $\Delta G^*(\text{soln})$ | $E^*(\text{abs})$ V | $E^*(\text{SHE})$ V |
|----------------------------------------------|------------------------|-------------------------|------------------|---------------------|---------------------|---------------------------|---------------------|---------------------|
| $[\text{Re}_6\text{S}_8\text{F}_6]^{4-}$     | -3034.34               | -3522.54                | -169.89          | -488.19             | -553.50             | -104.58                   | 4.53                | 0.35                |
| $[\text{Re}_6\text{S}_8\text{F}_6]^{3-}$     | -2864.46               | -3417.96                |                  |                     |                     |                           |                     |                     |
| $[\text{Re}_6\text{S}_8\text{Cl}_6]^{4-}$    | -2849.47               | -3295.58                | -183.83          | -446.12             | -521.91             | -108.04                   | 4.68                | 0.50                |
| $[\text{Re}_6\text{S}_8\text{Cl}_6]^{3-}$    | -2665.64               | -3187.55                |                  |                     |                     |                           |                     |                     |
| $[\text{Re}_6\text{S}_8\text{Br}_6]^{4-}$    | -2803.10               | -3229.06                | -189.89          | -425.96             | -506.94             | -108.91                   | 4.72                | 0.53                |
| $[\text{Re}_6\text{S}_8\text{Br}_6]^{3-}$    | -2613.21               | -3120.15                |                  |                     |                     |                           |                     |                     |
| $[\text{Re}_6\text{S}_8\text{I}_6]^{4-}$     | -2730.99               | -3140.93                | -209.38          | -409.94             | -512.92             | -106.39                   | 4.61                | 0.43                |
| $[\text{Re}_6\text{S}_8\text{I}_6]^{3-}$     | -2521.62               | -3034.53                |                  |                     |                     |                           |                     |                     |
| $[\text{Re}_6\text{S}_8(\text{CN})_6]^{4-}$  | -4696.53               | -5174.35                | -173.18          | -477.82             | -536.52             | -114.47                   | 4.96                | 0.78                |
| $[\text{Re}_6\text{S}_8(\text{CN})_6]^{3-}$  | -4523.35               | -5059.87                |                  |                     |                     |                           |                     |                     |
| $[\text{Re}_6\text{S}_8(\text{NC})_6]^{4-}$  | -4646.01               | -5094.14                | -177.79          | -448.12             | -511.69             | -114.22                   | 4.95                | 0.77                |
| $[\text{Re}_6\text{S}_8(\text{NC})_6]^{3-}$  | -4468.22               | -4979.92                |                  |                     |                     |                           |                     |                     |
| $[\text{Re}_6\text{S}_8(\text{NCO})_6]^{4-}$ | -5654.02               | -6192.63                | -148.86          | -538.60             | -578.36             | -109.10                   | 4.73                | 0.54                |
| $[\text{Re}_6\text{S}_8(\text{NCO})_6]^{3-}$ | -5505.16               | -6083.52                |                  |                     |                     |                           |                     |                     |
| $[\text{Re}_6\text{S}_8(\text{NCS})_6]^{4-}$ | -5257.01               | -5761.25                | -170.85          | -504.25             | -561.63             | -113.47                   | 4.92                | 0.73                |
| $[\text{Re}_6\text{S}_8(\text{NCS})_6]^{3-}$ | -5086.16               | -5647.79                |                  |                     |                     |                           |                     |                     |
| $[\text{Re}_6\text{S}_8(\text{OCN})_6]^{4-}$ | -5597.73               | -6079.67                | -175.51          | -481.94             | -536.55             | -120.90                   | 5.24                | 1.05                |
| $[\text{Re}_6\text{S}_8(\text{OCN})_6]^{3-}$ | -5422.22               | -5958.77                |                  |                     |                     |                           |                     |                     |

The redox potentials were corrected to  $E^0(\text{SHE}) = 4.188\text{V}$

The experimental  $\Delta G^0$  values were calculated from the absolute redox potentials (4.188V was added to the redox potentials listed in the table).

\*absolute value

**3. Table 2: Calculated Values of Changes in Gibbs Free Energies (kcal/mol) and Ground-State Redox Potentials (Volts) of the Rhenium-Selenium Complexes Using SC-ZORA/BP86/TZ2P.**

| Complexes                                     | Gas-phase G (kcal/mol) | Solv-phase G (kcal/mol) | $\Delta G$ (gas) | $\Delta G^n$ (solv) | $\Delta G^o$ (solv) | $\Delta G^*(\text{soln})$ | $E^*$ (abs) V | $E^*(\text{SHE})$ V |
|-----------------------------------------------|------------------------|-------------------------|------------------|---------------------|---------------------|---------------------------|---------------|---------------------|
| $[\text{Re}_6\text{Se}_8\text{F}_6]^{4+}$     | -2908.05               | -3392.95                | -170.60          | -484.90             | -552.05             | -103.44                   | 4.49          | 0.30                |
| $[\text{Re}_6\text{Se}_8\text{F}_6]^{3-}$     | -2737.45               | -3289.51                |                  |                     |                     |                           |               |                     |
| $[\text{Re}_6\text{Se}_8\text{Cl}_6]^{4+}$    | -2722.28               | -3163.49                | -180.62          | -441.21             | -517.92             | -103.90                   | 4.51          | 0.32                |
| $[\text{Re}_6\text{Se}_8\text{Cl}_6]^{3-}$    | -2541.66               | -3059.58                |                  |                     |                     |                           |               |                     |
| $[\text{Re}_6\text{Se}_8\text{Br}_6]^{4+}$    | -2677.77               | -3098.42                | -186.15          | -420.65             | -502.30             | -104.49                   | 4.53          | 0.34                |
| $[\text{Re}_6\text{Se}_8\text{Br}_6]^{3-}$    | -2491.63               | -2993.93                |                  |                     |                     |                           |               |                     |
| $[\text{Re}_6\text{Se}_8\text{I}_6]^{4+}$     | -2610.65               | -3011.19                | -208.03          | -400.54             | -505.48             | -103.10                   | 4.47          | 0.28                |
| $[\text{Re}_6\text{Se}_8\text{I}_6]^{3-}$     | -2402.61               | -2908.09                |                  |                     |                     |                           |               |                     |
| $[\text{Re}_6\text{Se}_8(\text{CN})_6]^{4+}$  | -4582.52               | -5059.63                | -169.74          | -477.11             | -536.36             | -110.49                   | 4.79          | 0.60                |
| $[\text{Re}_6\text{Se}_8(\text{CN})_6]^{3-}$  | -4412.78               | -4949.14                |                  |                     |                     |                           |               |                     |
| $[\text{Re}_6\text{Se}_8(\text{NC})_6]^{4+}$  | -4524.50               | -4969.24                | -174.25          | -444.74             | -509.31             | -109.68                   | 4.76          | 0.57                |
| $[\text{Re}_6\text{Se}_8(\text{NC})_6]^{3-}$  | -4350.24               | -4859.56                |                  |                     |                     |                           |               |                     |
| $[\text{Re}_6\text{Se}_8(\text{NCO})_6]^{4+}$ | -5534.34               | -6065.64                | -143.18          | -531.29             | -568.91             | -105.56                   | 4.58          | 0.39                |
| $[\text{Re}_6\text{Se}_8(\text{NCO})_6]^{3-}$ | -5391.17               | -5960.08                |                  |                     |                     |                           |               |                     |
| $[\text{Re}_6\text{Se}_8(\text{NCS})_6]^{4+}$ | -5136.79               | -5634.49                | -164.81          | -497.70             | -556.61             | -105.90                   | 4.59          | 0.40                |
| $[\text{Re}_6\text{Se}_8(\text{NCS})_6]^{3-}$ | -4971.98               | -5528.59                |                  |                     |                     |                           |               |                     |
| $[\text{Re}_6\text{Se}_8(\text{OCN})_6]^{4+}$ | -5470.89               | -5946.62                | -172.18          | -475.74             | -533.08             | -114.84                   | 4.98          | 0.79                |
| $[\text{Re}_6\text{Se}_8(\text{OCN})_6]^{3-}$ | -5298.70               | -5831.78                |                  |                     |                     |                           |               |                     |

The redox potentials were corrected to  $E^0(\text{SHE}) = 4.188\text{V}$

The experimental  $\Delta G^0$  values were calculated from the absolute redox potentials (4.188V was added to the redox potentials listed in the table).

\*absolute value
